# Supplementary material for: Developing practical recommendations for preventative healthcare consultations involving dogs and cats using a Delphi technique
Source: PubMed Central journal article supplement — Vet Rec. 2019 Feb 14;184(11):348. doi: 10.1136/vr.104970 (PMC6589460; doi:10.1136/vr.104970), 2019-02-14
Supplement: vetrec-2018-104970supp001.pdf [file vetrec-2018-104970supp001.pdf]

## Supplementary material

Table S1. Details of the 22 veterinary surgeons recruited to the Delphi panel who completed at least one round of questionnaire. All veterinary surgeons performed the equivalent of at

| No. | Sex    | Years qualified | Practice type    | Species seen <sup>2</sup> | Role                      | Location         |
|-----|--------|-----------------|------------------|---------------------------|---------------------------|------------------|
| 1   | Female | 2002            | Corporate        | Small                     | Assistant                 | Midlands         |
| 2   | Female | 1986            | Corporate        | Small                     | Assistant                 | Wales            |
| 3   | Female | 1978            | Independent      | Small                     | Assistant                 | North West       |
| 4   | Female | 2010            | Corporate        | Mixed                     | Assistant                 | South West       |
| 5   | Female | 2012            | Independent      | Small                     | Assistant                 | North West       |
| 6   | Female | 2007            | Independent      | Small                     | Assistant                 | Wales            |
| 7   | Male   | 1986            | Independent      | Small                     | Partner/Clinical director | South West       |
| 8   | Female | 1994            | Independent      | Small                     | Assistant                 | South            |
| 9   | Male   | 1988            | Independent      | Small                     | Partner/Clinical director | Scotland         |
| 10  | Male   | 1983            | Independent      | Small                     | Partner/Clinical director | North East       |
| 11  | Male   | 2012            | Independent      | Small                     | Assistant                 | Midlands         |
| 12  | Male   | 2001            | Independent      | Small                     | Assistant                 | South East       |
| 13  | Female | 1996            | Independent      | Small                     | Partner/Clinical director | Midlands         |
| 14  | Female | 1989            | Independent      | Small                     | Assistant                 | South East       |
| 15  | Male   | 2012            | JVP <sup>1</sup> | Small                     | Partner/Clinical director | North West       |
| 16  | Female | 1997            | Independent      | Small                     | Assistant                 | Scotland         |
| 17  | Female | 1981            | University       | Small                     | Assistant                 | South West       |
| 18  | Female | 1990            | Independent      | Small                     | Assistant                 | Scotland         |
| 19  | Female | 2003            | Independent      | Small                     | Assistant                 | South East       |
| 20  | Female | 2010            | Independent      | Small                     | Assistant                 | Scotland         |
| 21  | Female | 2003            | JVP <sup>1</sup> | Small                     | Partner/Clinical director | Northern Ireland |
| 22  | Female | 2003            | Independent      | Small                     | Assistant                 | Midlands         |

least 35 canine/feline preventative healthcare per 40 hour week.

<sup>1</sup>JVP            Joint Venture Partnership (a locally run practice which is part of a corporate group)

<sup>2</sup>Species seen ‘Small’ refers to veterinary surgeons treating only cats, dogs and other small pets

                  ‘Mixed’ refers to veterinary surgeons also treating equine, farm or other species

Table S2. Details of the seven owners recruited to the Delphi panel who completed at least one round of questionnaire. All owners involved had previously attended at least 5 canine/feline preventative healthcare consultations and had attended at least one preventative healthcare consultation within the 3 months prior to recruitment.

| No. | Sex    | No. of cats owned | No. of dogs owned | Location      |
|-----|--------|-------------------|-------------------|---------------|
| 1   | Female | 10                | 0                 | South West    |
| 2   | Female | 0                 | 2                 | East Midlands |
| 3   | Female | 0                 | 5                 | South East    |
| 4   | Male   | 12                | 0                 | South         |
| 5   | Female | 3                 | 1                 | South East    |
| 6   | Female | 0                 | 3                 | North East    |
| 7   | Female | 1                 | 1                 | North East    |

Table S3. List of the 18 original recommendations alongside details of rewordings which occurred as a result of the Delphi process.

| <b>Original recommendation entered into Round 1</b>                                                                                                                      | <b>Outcome after round 1</b>                                                                                                                 | <b>Outcome after round 2</b>                             | <b>Outcome after round 3</b> |
|--------------------------------------------------------------------------------------------------------------------------------------------------------------------------|----------------------------------------------------------------------------------------------------------------------------------------------|----------------------------------------------------------|------------------------------|
| To improve consistency across their practice, the practice team should agree on the purpose of their preventative healthcare consultations and what they should include. | Consensus reached                                                                                                                            | Not re-presented                                         | Not re-presented             |
| The practice team should agree on the role of each member of the team (vet, vet nurse, receptionist etc) in the practice preventative healthcare strategy.               | Consensus reached                                                                                                                            | Not re-presented                                         | Not re-presented             |
| The practice team should agree how details of the costs of preventative healthcare will be communicated to owners.                                                       | Consensus reached                                                                                                                            | Not re-presented                                         | Not re-presented             |
| Practices should make clear to owners the risks associated with preventative medicines and discuss alternatives.                                                         | Reworded to read "The practice team should agree how potential risks associated with preventative medicines will be communicated to owners." | Consensus reached                                        | Not re-presented             |
| Practices should make clear to owners the benefits of preventative healthcare and medicines to the individual animal, to the pet population and to public health.        | Consensus reached                                                                                                                            | Not re-presented                                         | Not re-presented             |
| Each patient should be allocated at least 15 minutes for a preventative                                                                                                  | Consensus not reached; no suggestions for rewording made                                                                                     | Consensus not reached; no suggestions for rewording made | Not re-presented             |

|                                                                                                                                                                                                                                                                  |                                                                                                                                                                                                                                                  |                                                                                                                                                                                                       |                   |
|------------------------------------------------------------------------------------------------------------------------------------------------------------------------------------------------------------------------------------------------------------------|--------------------------------------------------------------------------------------------------------------------------------------------------------------------------------------------------------------------------------------------------|-------------------------------------------------------------------------------------------------------------------------------------------------------------------------------------------------------|-------------------|
| healthcare consultation.                                                                                                                                                                                                                                         |                                                                                                                                                                                                                                                  |                                                                                                                                                                                                       |                   |
| The time allocated for each preventative healthcare consultation should be tailored to the individual patient and adjusted for patient age, species and known pre-existing conditions.                                                                           | Consensus reached                                                                                                                                                                                                                                | Not re-presented                                                                                                                                                                                      | Not re-presented  |
| Prior to each preventative healthcare consultation, the practice should explain to owners what may happen and what topics may be discussed.                                                                                                                      | Consensus not reached                                                                                                                                                                                                                            | Consensus not reached; reworded to "Prior to, or at the start of, each preventative healthcare consultation, the practice should explain to owners what may happen and what topics may be discussed." | Consensus reached |
| Prior to each preventative healthcare consultation the practice should encourage owners to consider any questions they have about their pet's health or preventative healthcare.                                                                                 | Consensus reached                                                                                                                                                                                                                                | Not re-presented                                                                                                                                                                                      | Not re-presented  |
| Prior to each preventative healthcare consultation, the practice should make it clear to owners that the content of the consultation may vary dependent upon species, breed, age and health of the patient and well as the needs and experience of the owner(s). | Consensus not reached; reworded to: "Prior to each preventative healthcare consultation, the practice should make it clear to owners that the content of the consultation may vary dependent upon species, breed, age and health of the patient" | Consensus not reached; no further suggestions for rewording made                                                                                                                                      | Not re-presented  |
| Prior to each preventative healthcare                                                                                                                                                                                                                            | Consensus not reached; reworded to " Prior to each preventative                                                                                                                                                                                  | Consensus not reached; no further suggestions for rewording made                                                                                                                                      | Not re-presented  |

|                                                                                                                                                                          |                                                                                                                                                                                                          |                                                                  |                  |
|--------------------------------------------------------------------------------------------------------------------------------------------------------------------------|----------------------------------------------------------------------------------------------------------------------------------------------------------------------------------------------------------|------------------------------------------------------------------|------------------|
| consultation, the practice should make it clear to owners that they can choose which veterinary surgeon they see.                                                        | healthcare consultation the practice should make it clear to owners that they can choose which veterinary surgeon they would like to see.”                                                               |                                                                  |                  |
| At the start of each preventative healthcare consultation, owners should be directly asked how much they understand about preventative healthcare and medicines.         | Consensus not reached; reworded to read: “ At the start of each preventative healthcare consultation, owners should be asked how much they understand about preventative healthcare and medicines.”      | Consensus not reached; no further suggestions for rewording made | Not re-presented |
| During each preventative healthcare consultation, owners should be encouraged to ask any questions they have about their pet’s health or preventative healthcare.        | Consensus reached                                                                                                                                                                                        | Not re-presented                                                 | Not re-presented |
| During each preventative healthcare consultation, a full clinical examination should be undertaken by a veterinary surgeon.                                              | Consensus not reached; reworded after round 1 to read “ During each preventative healthcare consultation, a full clinical examination should be undertaken by a veterinary surgeon or veterinary nurse.” | Consensus reached                                                | Not re-presented |
| As part of each preventative healthcare consultation, patients should be weighed and have their body condition score assessed using a scale agreed by the practice team. | Consensus reached                                                                                                                                                                                        | Not re-presented                                                 | Not re-presented |
| During each preventative healthcare consultation, owners should be made aware of both normal and abnormal                                                                | Consensus reached                                                                                                                                                                                        | Not re-presented                                                 | Not re-presented |

|                                                                                                                                                                                         |                                                                                                                                                                                                                         |                                                                  |                  |
|-----------------------------------------------------------------------------------------------------------------------------------------------------------------------------------------|-------------------------------------------------------------------------------------------------------------------------------------------------------------------------------------------------------------------------|------------------------------------------------------------------|------------------|
| findings from a clinical examination.                                                                                                                                                   |                                                                                                                                                                                                                         |                                                                  |                  |
| During each preventative healthcare consultation, it must be ensured that owners understand the rationale behind any recommendations made and alternatives discussed where appropriate. | Consensus reached                                                                                                                                                                                                       | Not re-presented                                                 | Not re-presented |
| At the end of a preventative healthcare consultation, a written summary of the findings and a plan for managing the patient's healthcare needs should be given to owners.               | Consensus not reached; reworded to read: " At the end of a preventative healthcare consultation, a written summary of the findings and a plan for managing the patient's healthcare needs should be offered to owners." | Consensus not reached; no further suggestions for rewording made | Not re-presented |

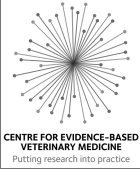

## Preventative healthcare consultation recommendations: Survey 1

### Instructions

Thank you for agreeing to take part in our research about preventative healthcare consultations involving dogs and cats. You are part of a small, anonymous panel of veterinary surgeons and pet owners who have considerable experience of these consultations so your input is very valuable to us.

The Centre for Evidence-based Veterinary Medicine have been researching preventative healthcare consultations for a number of years. We have converted the data we have collected (through surveys, observations and interviews) into recommendations that may have the potential to improve these consultations. We now need you to tell us whether or not you think they would help.

You will receive three rounds of this survey over the next 6-8 weeks.

#### **Instructions for completing this first survey**

There are 18 recommendations. You will be asked to consider each in turn and select from one of 4 options. Further explanation is given in an example before the first recommendation.

You can email us with any queries about any aspect of the process at [cevm@nottingham.ac.uk](mailto:cevm@nottingham.ac.uk) - we will respond between 9am and 5pm Monday-Friday.

Thank you for your participation.



## Preventative healthcare consultation recommendations: Survey 1

### Definitions

The definitions we are using throughout this survey are:

**Preventative healthcare** : Any strategy (including the use of preventative medicines) intended to prevent disease, illness or injury

**Preventative medicine(s)** : A drug or other preparation (e.g. vaccinations and parasite prevention) used to prevent disease, illness or injury

**Practice team**: Any member of the practice, including but not limited to veterinary surgeons, veterinary nurses and receptionists, who are involved in any aspect of preventative healthcare.

These definitions will be available again below each statement where that phrase is used.

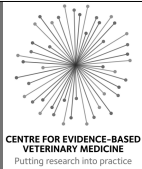

## Preventative healthcare consultation recommendations: Survey 1

### The complete list of recommendations for consideration in this round

Here is an overview of all the recommendations that you will be asked to consider on the following pages. You can return to this overview at any time.

At the end of the survey, you will be shown this full list of recommendations again and will be asked to add anything which you think is missing.

#### **Complete list of recommendations for consideration:**

1. To improve consistency across their practice, the practice team should agree on the purpose of their preventative healthcare consultations and what they should include.
2. The practice team should agree on the role of each member of the team (vet, vet nurse, receptionist etc) in the practice preventative healthcare strategy.
3. The practice team should agree how details of the costs of preventative healthcare will be communicated to owners.
4. Practices should make clear to owners the risks associated with preventative medicines and discuss alternatives.
5. Practices should make clear to owners the benefits of preventative healthcare and medicines to the individual animal, to the pet population and to public health.
6. Each patient should be allocated at least 15 minutes for a preventative healthcare consultation.
7. The time allocated for each preventative healthcare consultation should be tailored to the individual patient and adjusted for patient age, species and known pre-existing conditions.
8. Prior to each preventative healthcare consultation, the practice should explain to owners what may happen and what topics may be discussed.
9. Prior to each preventative healthcare consultation, the practice should make it clear to owners that the content of the consultation may vary dependent upon species, breed, age and health of the patient, as well as the needs and experience of the owner(s).
10. Prior to each preventative healthcare consultation the practice should make it clear to owners that they can choose which veterinary surgeon they see.
11. Prior to each preventative healthcare consultation the practice should encourage owners to consider any questions they have about their pet's health or preventative healthcare.
12. At the start of each preventative healthcare consultation, owners should be directly asked how much they understand about preventative healthcare and medicines.
13. During each preventative healthcare consultation, owners should be encouraged to ask any questions they have about their pet's health or preventative healthcare.
14. During each preventative healthcare consultation, a full clinical examination should be undertaken by a veterinary surgeon.
15. As part of each preventative healthcare consultation, patients should be weighed and have their body condition score assessed using a scale agreed by the practice team.
16. During each preventative healthcare consultation, owners should be made aware of both normal and abnormal findings from a clinical examination.
17. During each preventative healthcare consultation, it must be ensured that owners understand the rationale behind any recommendations made and alternatives discussed where appropriate.
18. At the end of a preventative healthcare consultation, a written summary of the findings and a plan for managing the patient's healthcare needs should be given to owners.





## Preventative healthcare consultation recommendations: Survey 1

### Example recommendation with instructions

#### How to complete your response to each recommendation:

The layout for each recommendation is shown in the example below. Each comes with the same four response options. You can choose only one option per recommendation, and all recommendations require a response. When reading the recommendations please don't worry about whether or not this recommendation would be feasible in your own practice. Instead, please think about whether you agree that the recommendation would improve preventative healthcare consultations if you were able to implement it.

If you agree with content and wording of a recommendation and believe it would improve preventative healthcare consultations, select **Agree**.

If you believe a recommendation would NOT improve preventative healthcare consultations, select **Disagree**.

If you want to change any aspect of the wording of a recommendation, select **Reword** and provide details in the box below.

If you don't understand, need more detail, or think a recommendation is not relevant to you, select **I need more information** and provide details in the box below. Any information you provide here will be used to develop the next round of the survey.

The first recommendation for you to consider is on the next page.

#### \* 1. Recommendation 1:

To improve consistency across their practice, the practice team should agree on the purpose of their preventative healthcare consultations and what they should include.

- Agree** - This recommendation would improve preventative healthcare consultations
- Disagree** - This recommendation would not improve preventative healthcare consultations
- Reword** - I want to change the wording of this statement
- I need more information before I can decide**

If you chose "reword" or "I need more information", please enter the re-worded phrase, or your query here.



### Recommendation 1

\* 1. Recommendation 1:

To improve consistency across their practice, the practice team should agree on the purpose of their preventative healthcare consultations and what they should include.

- Agree** - This recommendation would improve preventative healthcare consultations
- Disagree** - This recommendation would not improve preventative healthcare consultations
- Reword** - I want to change the wording of this statement
- I need more information before I can decide**

If you chose "reword" or "I need more information", please enter the re-worded phrase, or your query here.

**Definitions relevant to the recommendation above:**

**Preventative healthcare** : Any strategy (including the use of preventative medicines) intended to prevent disease, illness or injury

**Practice team**: Any member of the practice, including but not limited to veterinary surgeons, veterinary nurses and receptionists, who are involved in any aspect of preventative healthcare.



## Recommendation 2

### \* 2. Recommendation 2:

The practice team should agree on the role of each member of the team (vet, vet nurse, receptionist etc) in the practice preventative healthcare strategy.

- Agree** - This recommendation would improve preventative healthcare consultations
- Disagree** - This recommendation would not improve preventative healthcare consultations
- Reword** - I want to change the wording of this statement
- I need more information before I can decide**

If you chose "reword" or "I need more information", please enter the re-worded phrase, or your query here.

#### Definitions relevant to the recommendation above:

**Preventative healthcare** : Any strategy (including the use of preventative medicines) intended to prevent disease, illness or injury

**Practice team**: Any member of the practice, including but not limited to veterinary surgeons, veterinary nurses and receptionists, who are involved in any aspect of preventative healthcare.



Recommendation 3

\* 3. Recommendation 3:

The practice team should agree how details of the costs of preventative healthcare will be communicated to owners.

- Agree** - This recommendation would improve preventative healthcare consultations
- Disagree** - This recommendation would not improve preventative healthcare consultations
- Reword** - I want to change the wording of this statement
- I need more information before I can decide**

If you chose "reword" or "I need more information", please enter the re-worded phrase, or your query here.

**Definitions relevant to the recommendation above:**

**Preventative healthcare** : Any strategy (including the use of preventative medicines) intended to prevent disease, illness or injury

**Practice team**: Any member of the practice, including but not limited to veterinary surgeons, veterinary nurses and receptionists, who are involved in any aspect of preventative healthcare.



### Recommendation 4

\* 4. Recommendation 4:

Practices should make clear to owners the risks associated with preventative medicines and discuss alternatives.

- Agree** - This recommendation would improve preventative healthcare consultations
- Disagree** - This recommendation would not improve preventative healthcare consultations
- Reword** - I want to change the wording of this statement
- I need more information before I can decide**

If you chose "reword" or "I need more information", please enter the re-worded phrase, or your query here.

**Definitions relevant to the recommendation above:**

**Preventative medicine(s)** : A drug or other preparation (e.g. vaccinations and parasite prevention) used to prevent disease, illness or injury



### Recommendation 5

\* 5. Recommendation 5:

Practices should make clear to owners the benefits of preventative healthcare and medicines to the individual animal, to the pet population and to public health.

- Agree** - This recommendation would improve preventative healthcare consultations
- Disagree** - This recommendation would not improve preventative healthcare consultations
- Reword** - I want to change the wording of this statement
- I need more information before I can decide**

If you chose "reword" or "I need more information", please enter the re-worded phrase, or your query here.

**Definitions relevant to the recommendation above:**

**Preventative healthcare** : Any strategy (including the use of preventative medicines) intended to prevent disease, illness or injury

**Preventative medicine(s)** : A drug or other preparation (e.g. vaccinations and parasite prevention) used to prevent disease, illness or injury



### Recommendation 6

\* 6. Recommendation 6:

Each patient should be allocated at least 15 minutes for a preventative healthcare consultation.

- Agree** - This recommendation would improve preventative healthcare consultations
- Disagree** - This recommendation would not improve preventative healthcare consultations
- Reword** - I want to change the wording of this statement
- I need more information before I can decide**

If you chose "reword" or "I need more information", please enter the re-worded phrase, or your query here.

**Definitions relevant to the recommendation above:**

**Preventative healthcare** : Any strategy (including the use of preventative medicines) intended to prevent disease, illness or injury



Recommendation 7

\* 7. Recommendation 7:

The time allocated for each preventative healthcare consultation should be tailored to the individual patient and adjusted for patient age, species and known pre-existing conditions.

- Agree** - This recommendation would improve preventative healthcare consultations
- Disagree** - This recommendation would not improve preventative healthcare consultations
- Reword** - I want to change the wording of this statement
- I need more information before I can decide**

If you chose "reword" or "I need more information", please enter the re-worded phrase, or your query here.

**Definitions relevant to the recommendation above:**

**Preventative healthcare** : Any strategy (including the use of preventative medicines) intended to prevent disease, illness or injury





Recommendation 8

\* 8. Recommendation 8:

Prior to each preventative healthcare consultation, the practice should explain to owners what may happen and what topics may be discussed.

- Agree** - This recommendation would improve preventative healthcare consultations
- Disagree** - This recommendation would not improve preventative healthcare consultations
- Reword** - I want to change the wording of this statement
- I need more information before I can decide**

If you chose "reword" or "I need more information", please enter the re-worded phrase, or your query here.

**Definitions relevant to the recommendation above:**

**Preventative healthcare** : Any strategy (including the use of preventative medicines) intended to prevent disease, illness or injury



Recommendation 9

\* 9. Recommendation 9:

Prior to each preventative healthcare consultation, the practice should make it clear to owners that the content of the consultation may vary dependent upon species, breed, age and health of the patient, as well as the needs and experience of the owner(s).

- Agree** - This recommendation would improve preventative healthcare consultations
- Disagree** - This recommendation would not improve preventative healthcare consultations
- Reword** - I want to change the wording of this statement
- I need more information before I can decide**

If you chose "reword" or "I need more information", please enter the re-worded phrase, or your query here.

**Definitions relevant to the recommendation above:**

**Preventative healthcare** : Any strategy (including the use of preventative medicines) intended to prevent disease, illness or injury



### Recommendation 10

\* 10. Recommendation 10:

Prior to each preventive healthcare consultation the practice should make it clear to owners that they can choose which veterinary surgeon they see.

- Agree** - This recommendation would improve preventative healthcare consultations
- Disagree** - This recommendation would not improve preventative healthcare consultations
- Reword** - I want to change the wording of this statement
- I need more information before I can decide**

If you chose "reword" or "I need more information", please enter the re-worded phrase, or your query here.

**Definitions relevant to the recommendation above:**

**Preventative healthcare** : Any strategy (including the use of preventative medicines) intended to prevent disease, illness or injury



### Recommendation 11

\* 11. Recommendation 11:

Prior to each preventative healthcare consultation the practice should encourage owners to consider any questions they have about their pet's health or preventative healthcare.

- Agree** - This recommendation would improve preventative healthcare consultations
- Disagree** - This recommendation would not improve preventative healthcare consultations
- Reword** - I want to change the wording of this statement
- I need more information before I can decide**

If you chose "reword" or "I need more information", please enter the re-worded phrase, or your query here.

**Definitions relevant to the recommendation above:**

**Preventative healthcare** : Any strategy (including the use of preventative medicines) intended to prevent disease, illness or injury



### Recommendation 12

#### \* 12. Recommendation 12:

At the start of each preventative healthcare consultation, owners should be directly asked how much they understand about preventative healthcare and medicines.

- Agree** - This recommendation would improve preventative healthcare consultations
- Disagree** - This recommendation would not improve preventative healthcare consultations
- Reword** - I want to change the wording of this statement
- I need more information before I can decide**

If you chose "reword" or "I need more information", please enter the re-worded phrase, or your query here.

#### Definitions relevant to the recommendation above:

**Preventative healthcare** : Any strategy (including the use of preventative medicines) intended to prevent disease, illness or injury

**Preventative medicine(s)** : A drug or other preparation (e.g. vaccinations and parasite prevention) used to prevent disease, illness or injury



### Recommendation 13

\* 13. Recommendation 13:

During each preventative healthcare consultation, owners should be encouraged to ask any questions they have about their pet's health or preventative healthcare.

- Agree** - This recommendation would improve preventative healthcare consultations
- Disagree** - This recommendation would not improve preventative healthcare consultations
- Reword** - I want to change the wording of this statement
- I need more information before I can decide**

If you chose "reword" or "I need more information", please enter the re-worded phrase, or your query here.

**Definitions relevant to the recommendation above:**

**Preventative healthcare** : Any strategy (including the use of preventative medicines) intended to prevent disease, illness or injury



Recommendation 14

\* 14. Recommendation 14:

During each preventative healthcare consultation, a full clinical examination should be undertaken by a veterinary surgeon.

- Agree** - This recommendation would improve preventative healthcare consultations
- Disagree** - This recommendation would not improve preventative healthcare consultations
- Reword** - I want to change the wording of this statement
- I need more information before I can decide**

If you chose "reword" or "I need more information", please enter the re-worded phrase, or your query here.

**Definitions relevant to the recommendation above:**

**Preventative healthcare** : Any strategy (including the use of preventative medicines) intended to prevent disease, illness or injury



Recommendation 15

\* 15. Recommendation 15:

As part of each preventative healthcare consultation, patients should be weighed and have their body condition score assessed using a scale agreed by the practice team.

- Agree** - This recommendation would improve preventative healthcare consultations
- Disagree** - This recommendation would not improve preventative healthcare consultations
- Reword** - I want to change the wording of this statement
- I need more information before I can decide**

If you chose "reword" or "I need more information", please enter the re-worded phrase, or your query here.

**Definitions relevant to the recommendation above:**

**Preventative healthcare** : Any strategy (including the use of preventative medicines) intended to prevent disease, illness or injury

**Practice team**: Any member of the practice, including but not limited to veterinary surgeons, veterinary nurses and receptionists, who are involved in any aspect of preventative healthcare





Recommendation 16

\* 16. Recommendation 16:

During each preventative healthcare consultation, owners should be made aware of both normal and abnormal findings from a clinical examination.

- Agree** - This recommendation would improve preventative healthcare consultations
- Disagree** - This recommendation would not improve preventative healthcare consultations
- Reword** - I want to change the wording of this statement
- I need more information before I can decide**

If you chose "reword" or "I need more information", please enter the re-worded phrase, or your query here.

**Definitions relevant to the recommendation above:**

**Preventative healthcare** : Any strategy (including the use of preventative medicines) intended to prevent disease, illness or injury



Recommendation 17

\* 17. Recommendation 17:

During each preventative healthcare consultation, it must be ensured that owners understand the rationale behind any recommendations made and alternatives discussed where appropriate.

- Agree** - This recommendation would improve preventative healthcare consultations
- Disagree** - This recommendation would not improve preventative healthcare consultations
- Reword** - I want to change the wording of this statement
- I need more information before I can decide**

If you chose "reword" or "I need more information", please enter the re-worded phrase, or your query here.

**Definitions relevant to the recommendation above:**

**Preventative healthcare** : Any strategy (including the use of preventative medicines) intended to prevent disease, illness or injury



Recommendation 18

\* 18. Recommendation 18:

At the end of a preventative healthcare consultation, a written summary of the findings and a plan for managing the patient's healthcare needs should be given to owners.

- Agree** - This recommendation would improve preventative healthcare consultations
- Disagree** - This recommendation would not improve preventative healthcare consultations
- Reword** - I want to change the wording of this statement
- I need more information before I can decide**

If you chose "reword" or "I need more information", please enter the re-worded phrase, or your query here.

**Definitions relevant to the recommendation above:**

**Preventative healthcare** : Any strategy (including the use of preventative medicines) intended to prevent disease, illness or injury



## Preventative healthcare consultation recommendations: Survey 1

### The complete list of recommendations for consideration

Having considered each recommendation individually, please look through the complete list of 18 original recommendations again. If there are any additional recommendations that you think could improve preventative healthcare consultations but are not included in either this original list or in your revised wording, please add these to the box at the end.

#### **Recommendations for consideration:**

1. To improve consistency across their practice, the practice team should agree on the purpose of their preventative healthcare consultations and what they should include.
2. The practice team should agree on the role of each member of the team (vet, vet nurse, receptionist etc) in the practice preventative healthcare strategy.
3. The practice team should agree how details of the costs of preventative healthcare will be communicated to owners.
4. Practices should make clear to owners the risks associated with preventative medicines and discuss alternatives.
5. Practices should make clear to owners the benefits of preventative healthcare and medicines to the individual animal, to the pet population and to public health.
6. Each patient should be allocated at least 15 minutes for a preventative healthcare consultation.
7. The time allocated for each preventative healthcare consultation should be tailored to the individual patient and adjusted for patient age, species and known pre-existing conditions.
8. Prior to each preventative healthcare consultation, the practice should explain to owners what may happen and what topics may be discussed.
9. Prior to each preventative healthcare consultation, the practice should make it clear to owners that the content of the consultation may vary dependent upon species, breed, age and health of the patient, as well as the needs and experience of the owner(s).
10. Prior to each preventative healthcare consultation the practice should make it clear to owners that they can choose which veterinary surgeon they see.
11. Prior to each preventative healthcare consultation the practice should encourage owners to consider any questions they have about their pet's health or preventative healthcare.
12. At the start of each preventative healthcare consultation, owners should be directly asked how much they understand about preventative healthcare and medicines.
13. During each preventative healthcare consultation, owners should be encouraged to ask any questions they have about their pet's health or preventative healthcare.
14. During each preventative healthcare consultation, a full clinical examination should be undertaken by a veterinary surgeon.
15. As part of each preventative healthcare consultation, patients should be weighed and have their body condition score assessed using a scale agreed by the practice team.
16. During each preventative healthcare consultation, owners should be made aware of both normal and abnormal findings from a clinical examination.
17. During each preventative healthcare consultation, it must be ensured that owners understand the rationale behind any recommendations made and alternatives discussed where appropriate.
18. At the end of a preventative healthcare consultation, a written summary of the findings and a plan for managing the patient's healthcare needs should be given to owners.

19. Please insert any additional recommendations that you think would improve preventative healthcare consultations in the box below.



## Preventative healthcare consultation recommendations: Survey 1

Thank you

Thank you for taking the time to submit your responses. If you would like to leave any further comments about any aspect of the process, please feel free to do so in the box below.

Once you have responded to all questions, please select 'Done' below to finish the survey. Once you select this option, you will no longer be able to edit any of your responses.

We will be in touch by email with information about the next round shortly.

20. Further comments.
